# Supplementary material for: Enhancing Public Health Outcomes: A Qualitative Study of Former Participants' Experiences of the Green Prescription Program in Aotearoa New Zealand
Source: Research Square preprint supplement (doi:10.21203/rs.3.rs-6764541/v1), 2025-06-05
Supplement: Supplementary file 1 [file eb616ffa22074bd69116a3cc.pdf]

Manuscript title: "Enhancing Public Health Outcomes: A Qualitative Study of Former Participants' Experiences of the Green Prescription Program in Aotearoa New Zealand".

Questions posed to all participants during their semi-structured interviews:

1. *What was your experience of Green Prescription?*
2. *How did Green Prescription affect your physical activity levels?*
3. *How did Green Prescription affect your mental health?*
4. *How did Green Prescription affect your quality of life?*
5. *What would you recommend to improve Green Prescription?*
6. *What would attract more people who are considering to take up Green Prescription to do so?*
